# Supplementary material for: Free-standing nanopaper electrode for all-printed super-flexible perovskite solar cells
Source: Research Square preprint supplement (doi:10.21203/rs.3.rs-296909/v1), 2021-03-10
Supplement: Supplementary file 1 [file 86ac6a3121f8635c65c91b09.docx]

**Supplementary Information**

**Free-standing nanopaper electrode for all-printed super-flexible perovskite solar cells**

Maria Vasilopoulou1,*, Wilson Jose da Silva2, Hyeong Pil Kim3, Brett Nathan Carnio4, Behzad Ahvazi5, Mohamad Firdaus Mohamad Noh6, Mohd Fairuz bin Soh6, Fabio Kurt Schneider2, Abdulhakem Youssef Elezzabi4, Mohd Asri Mat Teridi6, Anastasia Soultati1, Panagiotis Argitis1, Dimitris Davazoglou1, Jin Jang3, Iain McCulloch7,8, Nicola Gasparini9,*, Abd. Rashid bin Mohd Yusoff10,*, Mohhamad Khadja Nazeeruddin11,*

1Institute of Nanoscience and Nanotechnology, National Center for Scientific Research “Demokritos”, 15341 Agia Paraskevi, Attica, Greece

2Universidade Tecnologica Federal do Parana, GPGEI – Av. Sete de Setembro, 3165 – CEP 80230-901, Curitiba, Parana, Brazil

3Advanced Display Research Center, Department of Information Display, Kyung Hee University, Dongdaemoon-gu, Seoul 130-701, South Korea

4Ultrafast Optics and Nanophotonics Research Laboratory, University of Alberta, Edmonton, Alberta T6G 2V4, Canada

5InnoTech Alberta, 250 Karl Clark Rd, Edmonton, Alberta T6N 1E4, Canada

6Solar Energy Research Institute, Universiti Kebangsaan Malaysia, 43600 Bangi, Selangor, Malaysia

7King Abdullah University of Science and Technology (KAUST), KAUST Solar Center (KSC), Thuwal, 23955, Saudi Arabia

8Department of Chemistry, Chemistry Research Laboratory, University of Oxford, Oxford, OX13TA, UK

9Department of Chemistry and Centre for Processable Electronics, Imperial College London, W120BZ, UK

10Department of Chemical Engineering, Pohang University of Science and Technology (POSTECH), Pohang, Gyeongbuk 37673, Republic of Korea

11Institute of Chemical Sciences and Engineering, École Polytechnique Fédérale de Lausanne (EPFL), Rue de l’Industrie 17, CH-1951 Sion, Switzerland

E-mail: m. [vasilopoulou@inn.demokritos.gr](mailto:vasilopoulou@inn.demokritos.gr), [abdr@khu.ac.kr](mailto:abdr@khu.ac.kr), mdkhaja.nazeeruddin@epfl.ch

**Supplementary Fig. 1** **Synthetic procedure.** Preparation steps of cellulose nanocrystals in the form of a white powder based on an acid hydrolysis reaction.

**Supplementary Fig. 2** **Surface topography of the conductive nanocrystaline cellulose (CNC) (i.e., nanopaper) substrate.** High-resolution images of the CNC film: white light image (left) and an atomic force microscope image (right). Cellulose nanocrystals are observed having widths of 30-50 nm. Polyoxometalate clusters are uniformly dispersed within the cellulosic nanopaper since there is no evidence of the extended formation of POM aggregates.

**Supplementary Fig. 3.** **Structural characterization.** XRD diffractograms of nanocrystalline cellulose, pristine POM, super-reduced POM and nanopaper.

**Supplementary Note 1. Detailed discussion on super-reduction of POM**

Polyoxometalates (POMs) are inorganic molecular clusters including a large number of transition metal cations (also known as addendas) and oxygen anions (also known as ligands) with the addition of some heteroatoms (such as hydrogen or phosphorus). They adopt either the Keggin or Wells-Dawson structure1,2. Those of the Keggin structure can be considered as the sum of four substructures consist of three MO6 octahedra each, where M is a transition metal ion, such as tungsten (W6+) and molybdenum (Mo6+). One of the most intriguing properties of POMs is their capability to act as electron reservoirs; meaning that they can accept a large number of extra electrons without distorting their structure3-6. Early studies by Jean Pierre Lacunary on highly reduced metatungstate anionsindicated that the three-joint octahedral, constituting each of the four substructures of the POM cluster, can be reduced by up to six electrons and that this locally reduced structure would feature metal-metal bonds arranged in the form of triangles4. The capability of POMs to uptake a large excess of electrons is termed as super-reduction. These highly reduced species remain extremely stable despite the high negative charge obtained upon super-reduction7. This stability was attributed to a large number of metal-metal (M-M) bonds that form during the reduction process. Upon the formation of M-M bonds, the cluster slightly shrinks in size (as metal cations approach the one another), thus stabilizing the deformation forces caused by the large negative charge.

Herein, we used ammonium metatungstate hydrate ((NH4)6(H2W12O40).xH2O), which underwent a large degree of reduction when blended with urea (NH2CONH2). The mixture was added to the CNC solution to make cellulose nanopaper conductive. The specific POM cluster was selected among other clusters because it is capable of undergone a large degree of reduction without distorting its structure; it also possessees superior thermal stability. As any other Keggin structure, its configuration is as an assembly of four edge-sharing triangular substructures consisting of WO6 octahedral. In the initial structure, all the W ions are in the IV oxidation state8,9, as evidenced by the W4f core levels of the XP spectrum taken in a POM film deposited from a H2O/HCl solution (Supplementary Fig. 3a). This film is completely transparent in the visible part of the spectrum (Supplementary Fig. 3d). Upon the addition of a moderate amount of urea into the POM solution (molecular concentration urea:POM 3:2), a partially-reduced POM (termed as prPOM) structure was obtained as evidenced by the XP spectrum shown in Supplementary Fig. 3b. In addition to the full oxidative 6+ W state, some metal ions are present in a lower oxidation state 4+. This indicates that some metal cations in the cluster have gained two extra electrons, thus reducing their oxidation state. From the UV-Vis absorption spectrum, shown in Supplementary Fig. 3d, six electrons uptake per partially reduced cluster can be concluded, as evidenced by the rise of a broad visible band in the absorption spectrum centered at 580 nm10,11. This broadband is attributed to inter-valence charge transfer (IVCT) of POMs and indicates the formation of a reduced form (heteropoly-blue).

The reduction of POM clusters can be explained through electron transfer from urea to POMs, which act as efficient electron acceptors. Urea exhibits a strong electron donor capacity originating from its high degree of basicity, which makes its two lone pairs of electrons (one pair of electrons per amine group) to be located above and below its molecular plane, as occurs with the aromatic structures12. Due to its weak attraction from the rest of the molecule, this lone pair can be easily transferred to materials possessing low highest occupies molecular orbitals (LUMOs) like POMs13,14. Upon further addition of urea molecules into the POM solution (reaching an optimized molecular ratio 10:1), a larger amount of W4+ metal cations are formed (Supplementary Fig. 3c). In particular, six from the twelve metal cations per cluster are calculated from the XP spectrum to be in the oxidation state 4+. This is equivalent with a total of 12 excess electrons up taken by the cluster. This high amounts of excess electrons per cluster is attributed to the so-called super-reduction capacity of POMs. Moreover, the visible absorption band at 580 nm disappears and a small background absorption in the whole visible spectral region appears in the absorption spectrum. The intensity of the near-UV absorption band at 270 nm is also reduced. This peak is attributed to oxygen-to-metal charge transfer and its decrease denotes suppressed electronic interactions between metal cations and oxygen anions in the reduced clusters. The reduction of the UV peak in this super-reduced state is because the W metal cations interact with each other through the formation of M-M bonds which weaken their interactions with the oxygen anions15. When electrons become available in the W5d orbitals (which have the major contribution in the bottom of the conduction band and are normally empty in the oxidized clusters), these electrons are expected to participate in chemical bonding. For a given oxidation state X, the tungsten ion (WX+) will gain a total of 5d6-X electrons which are available to form tungsten-tungsten bonds with a maximum bond order sum of 6-X. Our super-reduced clusters exhibit seven W 4+ states per cluster, indicating the formation of either two single (W-W) or one double (W=W) bond for each W4+ state. This means that twelve W-W or six W=W bonds, or a combination of both, are formed in the super-reduced clusters. Therefore, these clusters acquire a high negative charge of -18 which can disrupt their structure. They, however, are found to be exceptionally stable despite the fact that they have the tendency to form large aggregates compared to the oxidized clusters (pristine state), which seemed to be in the form of small nanoparticles (Fig. 1c and Supplementary Fig. 5a). This aggregation tendency of the super-reduced structure can be explained on the basis of strong intermolecular interactions due to the presence of high charge (i.e., both negative and positive) in the outer surface of each cluster. The positive charges originate from the amino groups of urea that are left with a positive charge after transferring their pair of electrons to POMs upon the reduction of the latter and subsequently form coordination bonds with the reduced clusters. The coordination of urea molecules to POM clusters is supported by Fourier transform infrared spectroscopy. The significant reduction in the band appear at 1490 cm-1 in the FTIR spectra of POM:urea composite (Supplementary Fig. 4), which originates from the C-N stretching frequency in urea, indicates coordination between the nitrogen atoms of urea with POMs. The positively charged NH2+ groups of urea are most probably arranged in the outer POM shell through these coordination bonds, thus compensating the extra negative charge (Fig. 1f) and ensuring the structural integrity of each cluster. However, they also induce electrostatic interactions between individual clusters (through positive nitrogen atoms in one POM:urea composite with negative oxygen of another), forming large aggregates. Such large aggregates scatter incident light and cause the background UV-Vis absorption observed in the spectrum of srPOM (urea+POMs). When srPOM clusters are inserted into the cellulose matrix, the formation of aggregates is suppressed, and the clusters uniformly decorate the cellulose nanocrystals. This, in turn significantly reduces the background absorption, thus making the CNC+srPOM composite highly transparent. The uniform decoration of cellulose nanocrystals with srPOMs is due to their strong hydrogen bond interactions with the cellulosic nanocrystals through the formation of an extended network of hydrogen bonds. These hydrogen bonds were formed between O2- (of POM) and N3- (of urea molecules present in the outer shell of POMs) anions. Especially, the superior hydrogen bonding capability of urea originates from the positive character of the hydrogen atoms covalently bonded to the highly electronegative nitrogen atoms of the amino groups in its molecules16,17. These H atoms can form hydrogen bonds with another electron-dense atom (i.e. of negative character), such as the oxygen atom of the hydroxyl groups of cellulose nanocrystals. Such an event induces the direct interaction between urea molecules present in the outer shell of srPOMs and cellulosic nanocrystals thus resulting in the decoration of the nanocrystals with srPOMs.

**Supplementary Fig. 4** **Super reduction of polyoxometalate.** X-ray photoelectron (XP) spectra of **a**, pristine POM and **b**, partially reduced and **c**, super reduced POM. **d**, UV-Vis absorption spectra of pristine, partially reduced (heteropoly blue), super reduced POM (upon urea addition) and of CNC (cellulose nanocrystals, urea and POMs) film.

**Supplementary Fig. 5 Fourier Transform Infrared (FTIR) spectrum of polyoxometalate: urea composite.** The C=O stretching frequency of the urea molecule appears at 1,720 cm-1. The N–H stretching, and deformation frequencies appear at 3,455 cm-1 and 1,600 cm-1,respectively. The C–N stretching frequency appears at 1,480 cm-1. This band is significantly suppressed, indicating strong coordination between nitrogen atoms of urea with POM clusters. In the 1,020-500 cm-1 region the characteristic bands of POM appear. The band at 1010 cm-1 indicates the existence of W cations in a 4+ oxidation state.

**Supplementary Fig. 6 Morphology and electronic structure of super-reduced polyoxometalates. a**, Transmission electron microscopy (TEM) image depicting the aggregation tendency of super-reduced POM clusters before their insertion into the cellulose matrix. **b**, Ultra-violet photoelectron (UP) spectrum of a POM thin film before and after reduction to the super -reduced state (srPOM): the high-binding energy cut-off (left), the complete UP spectra (middle) and the near Fermi level region (right).

**Supplementary Fig. 7 POM anchoring onto cellulose nanocrystals**. O1s peaks of the XPS spectra of **a**, pristine POM, and **b**, super-reduced POM included in the cellulose:urea:POM composite. The srPOM clusters include oxygen anions bonded to hydrogen. The latter is due to the electronic interaction between O2- of POM and H+ of cellulose NCs through an extended hydrogen bond formation.

**Supplementary Note 2. Electronic structure of super-reduced POM**

To gain insights into the electronic structure of such super-reduced structures we examined the ultra-violet photoelectron (UP) spectra of fully oxidative and super-reduced POMs. As shown in Supplementary Fig. 5b, the initial cluster is a wide bandgap n-type semiconducting material having a work-function (WF) value of -4.4 eV (as derived from the secondary electron cut-off), a valence band maximum of -6.5 eV (taking into account the valence band onset of 2.1 eV near Fermi level region) and a conduction band minimum of -4.3 eV (considering an optical bandgap value of 4.2 eV). The valence band maximum, or else the *oxo* band, consisting mainly of a set of doubly occupied molecular orbitals with major contribution from O2p atomic orbitals, which are delocalized over the oxygen ligands. The bottom of the conduction band is formed by a set of unoccupied W5d orbitals, with the lowest amongst these orbitals to adopt dxy symmetry while those with dxz and dyz symmetry are higher in energy since the shorter terminal bonds destabilize them (Fig. 1h, left part)15. Upon the super-reduction of POM clusters, the near Fermi level region of the UP spectrum shows that the valence band onset shifts up to the Fermi level giving rise to a metallic material. This metallic behavior results from filling with the excess electrons of molecular orbitals derived from W5d atomic orbitals, which were unoccupied in the pristine structure. According to the theory proposed by Cotton in 196018, and the model presented by Nishimoto et al. for super-reduced α-Keggin-type polyoxometalate (POM3−) clusters [PM12O40]3− (M = Mo, W)15, since there are four triangular substructures in the Keggin POM and the super-reduction of our POM involves 12 excess electrons, one such substructure should gain three electrons which occupy three molecular orbitals having e and a1 symmetry. These three molecular orbitals arise from hybridization of three W 5d atomic orbitals (in particular, the low lying 5dxy ones). The decreased W-W distances in the W triangle enhance the overlap of these orbitals and further lower their relative orbital energies. The lowest occupied orbitals with the a1 symmetry derive from W metal ions forming double W=W bonds while those of e symmetry correspond to single W-W bonds and exhibit a strong antibonding character19. Once the four substructures are assembled into POM18-, the four a1 and eight e molecular orbitals split into groups of one a1 and three t2 and two e, three t1 and three t2 molecular orbitals, respectively. Filling of these orbitals with the excess of 12 electrons in the super-reduced structure results in occupation of gap states near the Fermi level as detected by ultra-violet photoelectron spectroscopy (UPS). These states endow the srPOM with nearly metallic behavior thus making the CNC+srPOM nanopaper an excellent conductor.


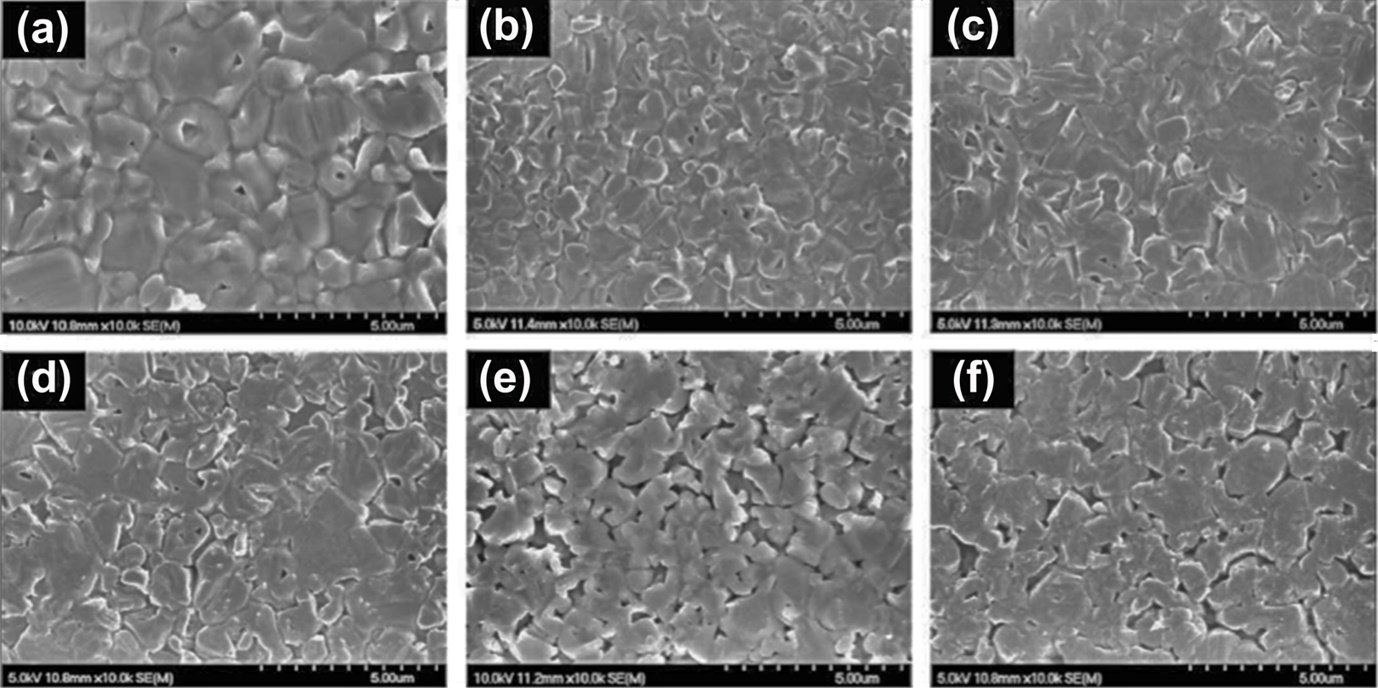


**Supplementary Fig. 8 Surface morphology of perovskite absorber.** Scanning electron microscopy (SEM) surface morphology of RbCsMAFA perovskite film printed *via* solution shearing at a substrate temperature of **a,d,** 100 °C; **b,e,** 120 °C; **c,f,** 135 °C. The scale bar is 5 μm. **Supplementary Fig. 9 Optoelectronic properties of perovskite films**. **a**, X-ray diffraction (XRD) pattern of the perovskite film heated at 100 oC. **b**, UV-Vis absorption, and **c**, steady-state photoluminescence (PL) spectrum of the same perovskite film. **d**, Transient PL decay rate of a printed perovskite film heated at 100 oC.

**Supplementary Note 3. Preparation of cellulose:Ag NW top electrode**

Silver nanowires (Ag NWs) represent one of the most promising solution processed electrode materials with ∼90% transmittance at 550 nm and high conductivity comparable with that of indium tin oxide (ITO)19. Ag NWs have been widely applied as semi-transparent electrodes in organic optoelectronics usually in the form of composites with poly(3,4-ethylenedioxythiophene):poly(styrene sulfonate) (PEDOT:PSS)20. The solubility of the perovskite films on the water or methanol, however, commonly used for Ag NWs processing hinders their implementation on top of the perovskite absorber. To alleviate this issue, recent studies reported that isopropanol (IPA) inclusion in Ag NWs solution can reduce the amount of solvent that interacts with the perovskite underlayer21. Furthermore, judicious selection of the deposition method was also proven as a key factor in protecting the quality of the perovskite film underneath. For example, spray coating, which is among the most commonly used techniques in printed electronics, enables the formation of high quality semi-transparent electrodes without scarifying the quality of the underlayer.

Here, we deposited high quality printed orthogonal arrays of Ag NWs embedded into a cellulosic matrix/dispersive agent using solutions in propylene glycol/dichloromethane (DCM)/IPA ternary solvent. Instead of using water solutions of Ag NWs (with a PEDOT:PSS organic binder), we applied a conducting ink by mixing 1 wt% Ag NWs in isopropyl alcohol with a mixed solution of hypromellose ([INN](https://en.wikipedia.org/wiki/International_Nonproprietary_Name)), also known as  hydroxypropyl methylcellulose (HPMC) (Supplementary Fig. 10a,b) as the organic matrix/binder. HPMC was selected because it is a viscoelastic polymer derived from biosources and can provide thixotropic behavior for the conducting ink when used as a rheological agent. HPMC also served as an excellent dispersive agent of Ag NWs since the hydroxy groups present in HPMC can form strong hydrogen bonds with the surface of the Ag NWs hence facilitating their dispersion into the matrix. A non-anionic fluorosurfactant (Zonyl FS-300, Supplementary Fig. 9a) was also added in the composite ink to decrease the surface tension in the solution thus promoting substrate wettability during shear solution printing. To prevent foam formation during mechanical agitation, a de-foamer (MO-2170) was added to the mixture. The additive solution has the formulation propylene glycol:DCM:HPMC:Zonyl FS-300:MO-2170 at the weight ratio of 5:5:1:0.002:0.01. After sonication for 2 h, volatile compounds were removed *via* vacuum rotary evaporation and the Ag NW solution was mixed with the additives in a ratio of 4:1 per weight. The solution was sonicated for 2h and then coated on Spiro-OMeTAD *via* solution shearing at adjusted speed to obtain the Ag NW array (Supplementary Fig. 10 c,d).

**Supplementary Fig. 10 Material structure and morphology of the Ag NWs cathode.** The chemical structures of **a**, (hydroxypropyl)methyl cellulose, **b**, fluoro-surfactant used for the preparation of the conducting ink. **c**, Top view, and **d**, cross-section scanning electron microscopy (SEM) images of the cellulose top electrode embedding an orthogonal array of Ag NWs.

**Supplementary Fig. 11** **Optimization of RbCsMAFA stretchable cell with CNC content.** **a**, J-V characteristics of PSCs fabricated on nanopaper with CNC density of less than 1 wt%. It is seen that the performance of the stretchable cell is less sensitive to the lower CNC density. **b**, J-V characteristics of the RbCsMAFA stretchable cell with various CNC densities (2-9 wt%). A decrease in JSC and FF and therefore in efficiency is observed when the CNC density is increased.

**Supplementary Fig. 12** Photographs of two complete devices demonstrating the different transparency of Ag NW cathodes corresponding to different thicknesses (320 nm , left, and 160 nm, right). The anode is a ~95% transparent nanopaper.

**Supplementary Fig. 13 Additional device performance metrics.** **a,** Current-density voltage (J-V) characteristics of PSCs fabricated on CNC substrate/anode with a Ag NWs cathode. The scan from forward bias to short circuit gives 19.72% and the reverse scan shows 19.89%. **b**, External quantum efficiency (EQE) spectrum and integrated JSC as derived from the EQE spectrum of the best-performing cells. **c**, J-V curve of the highest-VOC device. The inset shows that VOC increases, resulting in the maximum value of 1.085 V after 60 s. **d**, PCE statistic of 29 RbCsMAFA flexible/stretchable cells measured at a scan rate of 5 mV s-1. The extracted mean PCE value is 19.32 %.

**Supplementary Fig. 14 Device transparency.** **a**,Transmittance spectrum in the visible wavelength region of the best performing flexible/stretchable PSC. The device picture is shown as inset. **b**, The transmittance spectra of flexible/stretchable PSCs for different absorber thickness. For a perovskite thickness of 130 nm (AVT=24.73%) the PCE = 11.84%, while for 180 nm (AVT=16.33%) the PCE =15.62%.

**Supplementary Fig. 15 Device performance and stability tests of rigid and flexible PSCs.** Current density–voltage (J-V) curve, taken at a scanning rate of 5 mV s−1 (FS), of the best performing solar cell with different architectures: **a**, ITO anode on a glass substrate and Au cathode, **c,** CNC anode/substrate and Au cathode, **e**, ITO anode on a plastic substrate and Ag NWs cathode. Thermal stability test of the aforementioned perovskite solar cells. The cells were aged for 1,000 hours at 95°C under continuous full illumination and MPP tracking in a nitrogen atmosphere. During the light soaking at 95°C, the devices retained: **b**, 97% (glass/ITO and Au), **d**, 91% (CNC and Au), and **f**, 95% (ITO/plastic and Au NWs) of the initial PCE.

**Supplementary Fig. 16 Environmental stability study.** Variation ofPCE, FF, JSC, and VOC versus time of RbCsMAFA-based cells fabricated on different anodes and using different cathodes. The cells were tested for 1000 hours under continuous full sun illumination in ambient. **a**, PSCs using FTO/glass anode and Au cathode. **b**, PSCs using CNC anode and Au cathode. **c**, PSCs using CNC anode and Ag NWs cathode. **d**, PSCs using FTO/PET anode and Ag NWs cathode.

**Supplementary Fig. 17 Contact angle measurements.** Water contact angle measured on pristine cellulose and cellulose:urea:POM composite.

**Supplementary Note 4. Recyclability of nanopaper-based solar cells**

The increasing number of solar cells and modules results in a huge amount of waste at the end of their lifetime. For example, the cumulative global solar cell technology waste reached 250,000 metric tons at the end of 2016. This is expected to rapidly increase within the next years reaching 5.5–6 million tons in 205022. Much of the solar cell and module waste currently ends up in a landfill. Given that metals, glass and plastics are present in solar modules, this can result in severe environmental pollution. Therefore, methods for recycling solar modules should be urgently developed to reduce the environmental impact of end-of-life modules. However, most of the current recycling methods are based on recovering only a small part of the materials used in the fabrication of the solar modules, so there is an urgent need for progress in this area.

It is estimated that only about 10% of solar modules are recycled worldwide since there are no strict regulations on recycling policies. Moreover, the dominant silicon solar module technology needs high material recovering costs, making their recycling an economically unfavorable option23. There must be environmental friendly and low-cost recycling policies to be followed worldwide when solar cells and modules reach their lifetime end in order to ensure the sustainability of the long-term supply chain and reducing carbon dioxide (CO2) emissions and energy payback time of solar cell technology.

Several concerns have been raised on the use of the light absorbing material in perovskite solar cells. Studies, however, have demonstrated that the hazardous concerns of perovskites are unfounded. For example, to make a perovskite solar module of 1 m2, only 100 mg of lead is needed for an absorber thickness of about 500 nm24. Inorganic materials offer low profit from their recovery, such as silicon, glass, FTO and metal contacts are much more difficult to recycle and are considered to be the most significant contributors to the environmental pollution. By taking extra care to encapsulate the device to avoid lead leakage upon damage, the risks from environmental pollution within the lifetime of the cell can be greatly minimized. However, there are still the recyclability issues of the light absorbing layer and, most important, the FTO conductive electrodes and the gold metal. Recently, several reports reported that most of the different layers used in the fabrication of perovskite solar cells, such as the charge transport layers, the perovskite light absorber, and the top metal electrode, can be fully recycled. These materials can be recycled using low-cost, facile methods based on treatment with solvents. However, glass and FTO cannot be recycled with dissolution in such solvents.

The cellulose-based electrodes reported in this work make our device to be fully recyclable when treated with a combination of appropriate solvents. We were able to fully dissolve the PSC device within a few hours by using a mild concentration citric acid water solution25. Citric acid induces the hydrolysis of cellulosic matrices of both electrodes resulting in the formation of a furan-based bio-oil (Supplementary Fig. 18). Citric acid also etches and dissolves the SnO2/PCBM layer26, whereas water decomposes the perovskite absorber. By adjusting the citric acid solution concentration and heating the solution to 155 oC, our device can be fully dissolved within few hours. This is a truly environmental method that dissolutes the whole device without the need for strong inorganic acids, or drastic conditions. Notably, even when we exposed our device to a low concentration in citric acid citrate buffer (i.e. typically used for RNA isolation in biology) and without applying any heat, we demonstrated that the device can be completely dissolved after 200 days (Fig. 3d). The same experiment demonstrates the high resilience or our device to moisture within the next first 100 days of exposure.

**Supplementary Fig. 18 Reaction pathway for the hydrolysis of CNC by citric acid.**

**Supplementary Fig. 19 Mechanical flexibility and stretchability.** Schematic illustration of bending, folding, and stretching fatigue tests of solar cells.

**Supplementary Fig. 20 Mechanical stretchability tests**. Cross sectional SEM image taken after the nanopaper-based device was carefully detached from the solid support and then subjected to stretching tests through the application of 20% strain, after which, the devices were attached onto the solid support for SEM measurements.

**Supplementary Fig. 21 Mechanical stretchability tests**. Top view SEM images of the perovskite film deposited on CNC cathodes revealing that they start to experience progressive failure when the strain of stretching exceeds 20% (up) and 40% (middle). Cross-sectional view of the perovskite/ETL/CNC when the strain is 60% (bottom).

**Supplementary Table 1.** Variation in the sheet resistance and conductivity of 150 nm thick CNC films printed with different withdrawal rates of solution shearing.

| **Withdrawal rate**  **(m s-1)** | **Sheet resistance**  **(KΩ sq-1)** | **Conductivity**  **(S cm-1)** |
| --- | --- | --- |
| 1 | 2.00± 0.10 | 18 ± 0.15 |
| 2 | 2.10 ± 0.14 | 11.24 ± 0.21 |
| 3 | 3.80 ± 0.10 | 9.45 ± 0.03 |
| 4 | 4.60 ± 0.16 | 8.06 ± 0.08 |
| 5 | 5.40 ± 0.21 | 6.77 ± 0.15 |
| 6 | 6.20 ± 0.14 | 5.13 ± 0.22 |
| 7 | 7.10 ± 0.12 | 3.44 ± 0.31 |
| 8 | 7.60 ± 0.11 | 1.02 ± 0.21 |

**Supplementary Table 2.** Opticaltransparency of CNC films as the function of their thicknesses.

| Thickness  (nm) | T  (%)  (440nm) | T  (%)  (465nm) | T  (%)  (546nm) | T  (%)  (600nm) | T  (%)  (635nm) |
| --- | --- | --- | --- | --- | --- |
| 150 | 96.5 | 96.8 | 96.4 | 96.6 | 96.4 |
| 220 | 94.7 | 95.0 | 94.7 | 94.9 | 94.7 |
| 410 | 95.5 | 95.5 | 95.1 | 95.1 | 94.8 |
| 670 | 95.4 | 95.5 | 95.1 | 95.0 | 94.7 |
| 760 | 94.1 | 94.2 | 92.6 | 92.1 | 91.2 |

**Supplementary Table 3.** Performance characteristics oflarge area(1x1 cm2) flexible cells fabricated on CNC anode and using Ag NW cathode.

| **Scan direction** | **JSC (mA/cm2)** | **VOC (V)** | **FF (%)** | **PCE (%)** |
| --- | --- | --- | --- | --- |
| FS | 22.47 (22.37) | 1.05 (1.05) | 0.736 (0.735) | 17.35 (17.26) |
| RS | 22.65 (22.81) | 1.05 (1.05) | 0.737 (0.731) | 17.53 (17.51) |

**Supplementary Table 4.** Performance characteristics ofrigid PSCs fabricated on ITO/glass anode and using Au cathode.

| **Scan direction** | **JSC (mA/cm2)** | **VOC (V)** | **FF (%)** | **PCE (%)** |
| --- | --- | --- | --- | --- |
| FS | 25.98 (25.33) | 1.16 (1.16) | 0.749 (0.732) | 22.57 (22.33) |
| RS | 25.45 (25.11) | 1.16 (1.16) | 0.749 (0.737) | 22.08 (21.92) |

**Supplementary Table 5.** Performance characteristics offlexible PSCs fabricated on ITO/plastic (PET) anode and using Au cathode.

| **Scan direction** | **JSC (mA/cm2)** | **VOC (V)** | **FF (%)** | **PCE (%)** |
| --- | --- | --- | --- | --- |
| FS | 22.39 (22.27) | 1.13 (1.10) | 0.758 (0.755) | 19.09 (18.50) |
| RS | 22.90 (22.80) | 1.13 (1.10) | 0.743 (0.740) | 19.15 (18.56) |

**Supplementary Table 6.** Performance characteristics offlexible PSCs fabricated on ITO/plastic (PET) anode and using Ag NW cathode.

| **Scan direction** | **JSC (mA/cm2)** | **VOC (V)** | **FF (%)** | **PCE (%)** |
| --- | --- | --- | --- | --- |
| FS | 23.32 (22.87) | 1.08 (1.08) | 0.719 (0.708) | 18.11 (18.02) |
| RS | 23.00 (22.81) | 1.08 (1.08) | 0.717 (0.711) | 17.82 (17.73) |

**Supplementary Table 7.** PCE values of recently reported ITO-based flexible PSCs.

| Substrate | Device structure | PCE  (%) | Year | Ref. |
| --- | --- | --- | --- | --- |
| PET | ΙΤΟ/PEDOT:PSS/CH3NH3PbI3−xClx/PCBM/TiO*x*/Al) | 6.4 | 2013 | 27 |
| PET | ITO/ZnO/CH3NH3PbI3/spiro-OMeTAD/Au | 10.2 | 2014 | 28 |
| PET | ITO/TiO2/CH3NH3PbI3-xClx/spiro-OMeTAD/Au | 15.07 | 2015 | 29 |
| PET | ITO/NiOx/CH3NH3PbI3/C60/Bis-C60/Ag | 14.53 | 2016 | 30 |
| PEN | ITO/SnO2/ Zn2SnO4/ (FAPbI3)0.95(MAPbBr3)0.05/Spiro-OMeTAD/Au | 20.70 | 2020 | 31 |
| PEN | ITO/PEN/ZnO/CH3NH3PbI3/spiro-OMeTAD/MoO3/Ag | 11.34 | 2016 | 32 |
| PET | ITO/PET/ss-IL/(HC(NH2)2PbI3)0.85(CH3NH3PbBr3)0.15/ spiro-OMETAD/Au | 16.09 | 2016 | 33 |
| PET | ITO/SnO2/CH3NH3PbI3/spiro-OMeTAD/Au | 16.8 | 2016 | 34 |
| PEN | ITO/PEDOT-PSS/CH3NH3PbI3/C60-BCP/LiF/Al | 17.3 | 2016 | 35 |
| PEN | ITO/PTAA:F-TCNQ/CH3NH3PbI3/PCBM/BCP/Ag | 17.04 | 2017 | 36 |
| PET | ITO/PTAA/FAMAPbI3−xBrx/C60/BCP/Cu | 18.1 | 2017 | 37 |
| PET | ITO/SnO2/C60-SAM/MAFAPbI3/Spiro-OMeTAD/Au | 18.36 | 2017 | 38 |
| PET | ITO/Cu:NiO/MAPbI3/C60/BCP/Ag | 17.41 | 2018 | 39 |
| PET | ITO/Nb2O5/MAPbI3-DS/Spiro-OMeTAD/Au | 17.1 | 2018 | 40 |
| PET | ITO/MAPbI3/Spiro-OMeTAD/Au | 18.4 | 2018 | 41 |
| PET | ITO/SnO2-EDTA/CsFAPbI3/Spiro-OMeTAD/Au | 18.28 | 2018 | 42 |
| PET | ITO/SnO2/Cs0.05(FA0.85MA0.15)0.95Pb(I0.85Br0.15)3/Spiro-OMeTAD/Au | 17.18 | 2018 | 43 |
| PET | ITO/PEDOT-PSS/MAFAPbI3/C60/BCP/Ag | 11.74 | 2019 | 44 |
| PEN | ITO/PEDOT-PSS/MAFAPbI3/C60/BCP/Ag | 12.1 | 2019 | 45 |
| PET | ITO/PEDOT-PSS/MAFAPbI3/C60/BCP/Ag | 16.13 | 2019 | 46 |
| PEN | SnO2/FAI·PbI2·NMP+15%MACl/Spiro-OMeTAD/Au | 19.38 | 2019 | 47 |

**Supplementary Table 8.** PCE values of recently reported ITO-free flexible PSCs.

| Substrate | Device structure | PCE  (%) | Power-per-weight  (W g-1) | Year | Ref. |
| --- | --- | --- | --- | --- | --- |
| Stainless steel | TiO2/MAPbI3/spiro-OMeTAD/CNT | 3.3 | - | 2014 | 48 |
| PET | AZO/Ag/AZO/PEDOT-PSS/poly-TPD/MAPbI3/PCBM/Au | 7 | - | 2014 | 49 |
| Ti foil | TiO2/Al2O3/MAPbI3/spiro-OMeTAD/Ni | 10.3 | - | 2015 | 50 |
| PET | HNO3-SWNT/PEDOT-PSS/MAPbI3/PEDOT-PCBM/Al | 5.38 | - | 2015 | 51 |
| PET | PEDOT:PSS/CH3NH3PbI3−xClx/PTCDI/Cr2O3/Cr/Au | 12.0 | 23 | 2015 | 52 |
| PET | Ag-mesh/PH1000/PEDOT:PSS/MAPbI3/PCBM)/Al | 14.0 | 1.96 | 2016 | 53 |
| PET | AgNW/PEDOT:PSS planarization layer/CsMAFAPbIxBr3-x/PCBM/Al | 11.0 | - | 2017 | 54 |
| PES | Au/spiro-OMeTAD/CH3NH3PbI3/ZnO/AZO/AgNW/AZO | 11.23 | - | 2018 | 55 |
| PEN | AgNW/PH1000/PEDOT:PSS/CH3NH3PbBrxI3-x(MAPbBrxI3-x)/PC61BM/Al | 15.18 | 24.9 | 2019 | 56 |
| Polyurethane | Au/Cr2O3/Cr/ PTCDI/PCBM/ MAPBI3/PEDOT:PSS/PET | 12 | 23 | 2015 | 57 |
| Cellulose | Carbon/PaPbI3/C60+BCP/Cu+Au | 9.05 | - | 2018 | 58 |
| Cellulose | AgNW/PEDOT:PSS/MAPbI3/PC71BM/Al | 4.49 | - | 2019 | 59 |
| Cellulose | PEDOT:PSS/MAPbI3/PC71BM/Al | 4.25 | 0.56 | 2019 | 60 |
| Cellulose | IZO/PEDOT:PSS/ MAPbI3 /PCBM/Ag | 11.68 | - | 2019 | 61 |
| Nano-cellulose | CNC/SnO2/PCBM/RbCsMAFA/Spiro-OMeTAD/Ag NW:cellulose | **19.89** | **38.47** | **2021** | **This work** |

**References**

1. Pope, M. T. & Müller, A. Polyoxometalate chemistry: An old field with new dimensions in several disciplines. *Angew. Chem., Int. Ed. Engl*. 30, 34−38 (1990).
2. Kuznetsov, A. E., Geletii, Y. V., Hill, C. L., Morokuma, K. & Musaev, D. G. Dioxygen and water activation processes on multi-Ru-substituted polyoxometalates: comparison with the “blue-dimer” water oxidation catalyst. *J. Am. Chem. Soc.* 131, 6844−6854 (2009).
3. Kawasaki, N. et al. Nanohybridization of polyoxometalate clusters and single‐wall carbon nanotubes: applications in molecular cluster batteries. *Angew. Chem., Int. Ed*. 123, 3533−3536 (2011).
4. Launay, J. P. [Reduction de l'ion metatungstate: stades eleves de reduction de H2W12O406−, derives de l'ion HW12O407− et discussion generale](https://www.sciencedirect.com/science/article/pii/0022190276803612). *J. Inorg. Nucl. Chem*. **38**, 807−816 (1976).
5. Wang, H. et al. In operando X-ray absorption fine structure studies of polyoxometalate molecular cluster batteries: polyoxometalates as electron sponges.*J. Am. Chem. Soc.* **134**, 4918−4924 (2012).
6. [López](https://pubs.acs.org/action/doSearch?field1=Contrib&text1=Xavier++L%C3%B3pez), X., [Bo](https://pubs.acs.org/action/doSearch?field1=Contrib&text1=Carles++Bo), C. & Poblet, J. M. Electronic properties of polyoxometalates:  electron and proton affinity of mixed-addenda Keggin and Wells-Dawson anions. *J. Am. Chem. Soc.*  **124**, 42, 12574–12582 (2002).
7. Howells, A. R., Sankarraj, A. & Shannon, C. A Diruthenium-substituted polyoxometalate as an electrocatalyst for oxygen generation. *J. Am. Chem. Soc.*  **126**, 39, 12258–12259 (2004).
8. Barreca, D.; Carta, G.; Gasparotto, A.; Rossetto, G.; Tondello, E.; Zanella,, P.; A Study of Nanophase Tungsten Oxides Thin Films by XPS*, Surf. Sci. Spectra* **8,** 258–267 (2001).
9. Weinhardt, L. Et al. Electronic surface level positions of WO3 thin films for photoelectrochemical hydrogen production *J. Phys. Chem. C* **112***,* 3078–3082 (2008).
10. Coronado, E. & Gomez-Garcia, C. J. Polyoxometalate-based molecular materials. *Chem. Reviews* **98**, 273−296 (1998).
11. Argitis, P., Srinivas, R. A., Carls, J. C. & Heller, A. Micropatterned films of tungsten nuclei for subsequent metallization formed of a phosphotungstic acid-based negative resist. J*. Electrochem. Sot.* **139**, 10, 2889−2893 (1992).
12. Ochoa, J. L., Porath, J., Kempf, J. & Egly, J.-M. Electron donor-acceptor properties of urea and its role in charge-transfer chromatography. *Journal of Chromatography* **180**, 257–261 (1988).
13. Smith, P. J., Kim, E.-i. & Wilcox, C. S. Substrate-specific catalysis by ion pairs. *Angew. Chem., Int. Ed. Engl*. **32**, 1648-1650 (1993).
14. Fan, E., Van Arman, S. A., Kincaid, S. & Hamilton, A. D. Molecular recognition: hydrogen-bonding receptors that function in highly competitive solvents. *J. Am. Chem. Soc.* **115**, 369–370 (1993).
15. Nishimoto, Y., Yokogawa, D., Yoshikawa, H., Awaga, K. & Irle, S. Super-reduced polyoxometalates: excellent molecular cluster battery components and semipermeable molecular capacitors. *J. Am. Chem. Soc*. **136**, 9042−9052 (2014).
16. Etter, M. C. & Reutzel, S. M. Hydrogen bond directed cocrystallization and molecular recognition properties of acyclic imides*. J. Am. Chem. Soc*. **113**, 2586–2598 (1991).
17. Roberts, J. M., Fini, B. M., Sarjeant, A. A., Farha, O. K., Hupp, J. T. & Scheidt, K. A. Urea Metal–Organic Frameworks as Effective and Size-Selective Hydrogen-Bond Catalysts. *J. Am. Chem. Soc.*  **134**, 7, 3334–3337 (2012).
18. Cotton, F. A. Metal atom clusters in oxide systems. *Inorg. Chem*. **3**, 1217−1220 (1964).
19. McCarley. R. E. Clusters in reduced molybdenum and tungsten oxide and sulfide systems. *Inorg. Chem.* **3**, 9, 1217–1220 (1964).
20. Liu, Y.-F., Feng, J., Cui, H.-F., Yin, D., Song, J.-F., Chen, Q.-D., Sun, H.-B. Highly flexible inverted organic solar cells with improved performance by using an ultrasmooth Ag cathode. *Appl. Phys. Lett.* **101** 133303 (2012).
21. Guo F. et al. High-performance semitransparent perovskite solar cells with solution-processed silver nanowires as top electrodes. ***Nanoscale* 7**, 1642–1649 (2015).
22. Weckend, S. Wade, A. & Heath G. End-of-life management solar photovoltaic panels. IRENA and IEA-PVPS (2016).
23. Huang, B., Zhao, J., Chai, J., Xue, B., Zhao, F. & Wang X. Environmental influence assessment of China’s multi-crystalline silicon (multi-Si) photovoltaic modules considering recycling process. *Solar Energy.* **143**, 132–141 (2017).
24. Kadro, J. M. et al. Proof-of-concept for facile perovskite solar cell recycling. *Energy & Environmental Science*. **9**(10), 3172–3179 (2016).
25. Romeo, I. et al. Totally green cellulose conversion into bio-oil and cellulose citrate using molten citric acid in an open system: synthesis, characterization and computational investigation of reaction mechanisms. ***RSC Adv.*** **10**, 34738–34751(2020).
26. Abdel Rehim, S. S., Sayyah, S. M. & El-Deeb, M. M. Corrosion of tin in citric acid solution and the effect of some inorganic anions. [*Materials Chemistry and Physics*](https://www.researchgate.net/journal/Materials-Chemistry-and-Physics-0254-0584) **80**(3):696–703 (2003).
27. Lee, M. M., Teuscher, J., Miyasaka, T., Murakami, T. N. & Snaith, H. J. Efficient hybrid solar cells based on meso-superstructured organometal halide perovskites. *Science* **338**, 643 (2012).
28. Stranks, S. D. & Snaith, H. J. Metal-halide perovskites for photovoltaic and light-emitting devices. *Nat. Nanotechnol.* **10**, 391 (2015).
29. Akkerman, Q. A. et al. Strongly emissive perovskite nanocrystal inks for high-voltage solar cells. *Nat. Energy* **2**, 16194 (2017).
30. Tan, Z.-K. et al. Bright light-emitting diodes based on organometal halide perovskite. *Nat. Nanotechnol.* **9**, 687–692 (2014).
31. Chung, J. et al. Record-efficiency flexible perovskite solar cell and module enabled by a porous-planar structure as an electron transport layer. ***Energy Environ. Sci.*** **13**, 4854-4861 (2020).
32. Docampo, P., Ball, J. M., Darwich, M., Eperon, G. E. & Snaith, H. Efficient organometal trihalide perovskite planar-heterojunction solar cells on flexible polymer substrates. *Nat. Commun.* **4**, 2761 (2013).
33. **Liu D. & Kelly, T. L.**Perovskite solar cells with a planar heterojunction structure prepared using room-temperature solution processing techniques. *Nat. Photonics* **8**, 133 (2014).
34. Yang, D. et al. High efficiency flexible perovskite solar cells using superior low temperature TiO2. ***Energy Environ. Sci.* 8**, 3208 (2015).
35. Zhang, H. et al. [Pinhole-free and surface-nanostructured NiO*x* film by room-temperature solution process for high-performance flexible perovskite solar cells with good stability and reproducibility](https://pubs.acs.org/doi/full/10.1021/acsnano.5b07043). *ACS Nano* **10**, 1503 (2016).
36. Gao, L.-L. et al. Preparation of flexible perovskite solar cells with gas pump drying method on plastic substrate. ***J. Mater. Chem. A* 4**, 3704 (2016).
37. Yang, D. et al. Hysteresis-suppressed high-efficiency flexible perovskite solar cells using solid-state ionic-liquids for effective electron transport. *Adv. Mater.* **28**, 5206 (2016).
38. Wang, C. et al. Low-temperature plasma-enhanced atomic layer deposition of tin oxide electron selective layers for highly efficient planar perovskite solar cells. ***J. Mater. Chem. A*** **4**, 12080 (2016).
39. Yoon, J. et al. Super flexible, high-efficiency perovskite solar cells employing graphene electrodes: toward future foldable power sources. *Energy Environ. Sci*. **10**, 337 (2016).
40. Dong, H. Pseudohalide-induced recrystallization engineering for CH3NH3PbI3 film and its application in highly efficient inverted planar heterojunction perovskite solar cells. *Adv. Funct. Mater.* **28**, 1704836 (2016).
41. Bi, C., Chen, B., Wei, H., DeLuca, S. & Huang, J. Efficient flexible solar cell based on composition-tailored hybrid perovskite. *Adv. Mater.* **29**, 1605900 (2017).
42. Wang, C. et al.Water vapor treatment of low-temperature deposited SnO2 electron selective layers for efficient flexible perovskite solar cells. *ACS Energy Lett.***2**, 2118 (2017).
43. Chen. W. et al. Understanding the doping effect on NiO: toward high performance inverted perovskite solar cells. *Adv. Energy Mater*. **8**, 1703519 (2018).
44. Yang, F. et al. [High bending durability of efficient flexible perovskite solar cells using metal oxide electron transport layer](https://pubs.acs.org/doi/full/10.1021/acs.jpcc.8b05008). *J. Phys. Chem. C* **122**, 17088 (2018).
45. Feng, J. Record efficiency stable flexible perovskite solar cell using effective additive assistant strategy. *Adv. Mater.* **30**, 1801418 (2018)
46. Yang, D. et al. High efficiency planar-type perovskite solar cells with negligible hysteresis using EDTA-complexed SnO2.*Nat. Commun*. **9**, 3239 (2018).
47. Pandey, M. et al.Dependence of ITO-coated flexible substrates in the performance and bending durability of perovskite solar cells. *Adv. Eng. Mater.* **21**, 1900288 (2019).
48. Bu, T. et al. Universal passivation strategy to slot-die printed SnO2 for hysteresis-free efficient flexible perovskite solar module. *Nat. Commun*. **9**, 4609 (2018).
49. Wu, C et al. FAPbI3 flexible solar cells with a record efficiency of 19.38% fabricated in air via ligand and additive synergetic process. *Adv. Energy Mater*. **29**, 1902974 (2019).
50. Troughton, Highly efficient, flexible, indium-free perovskite solar cells employing metallic substrates. ***J. Mater. Chem. A* 3**, 9141-9145(2015).
51. Pandey, M. et al. Efficient, hysteresis free, inverted planar flexible perovskite solar cells *via* perovskite engineering and stability in cylindrical encapsulation. ***Sustain. Energy Fuels* 3**, 1739 (2019).
52. Lee, E. et al. All-solution-processed silver nanowire window electrode based flexible perovskite solar cells enabled with amorphous metal oxide protection. *Adv. Energy Mater*. **8**, 1702182 (2018).
53. Qiu, L., Deng, J., Lu, X., Yang, Z. & Peng. H. Integrating perovskite solar cells into a flexible fiber. *Angew. Chem. Int. Ed.* **53**, 1 (2014).
54. Li, Y. et al. High-efficiency robust perovskite solar cells on ultrathin flexible substrates. *Nature Comm*. **7**, 10214 (2016).
55. Jeon, I. [Single-walled carbon nanotube film as electrode in indium-free planar heterojunction perovskite solar cells: investigation of electron-blocking layers and dopants](https://pubs.acs.org/doi/full/10.1021/acs.nanolett.5b02490). *Nano letters* **15**, 6665 (2015).
56. Roldan-Carmona, C. et al. Flexible high efficiency perovskite solar cells. ***Energy Environ. Sci.*** **7**, 994 (2014).
57. Kaltenbrunner, M. et al. Flexible high power-per-weight perovskite solar cells with chromium oxide–metal contacts for improved stability in air. *Nat. Mater.*  **14**, 1032 (2015).
58. Gao, C. et al. Flexible and biocompatibility power source for electronics: a cellulose paper based hole-transport-materials-free perovskite solar cell. *Sol. RRL* **2**, 1800175 (2018).
59. Ma, X. et al. Cellulose transparent conductive film and its feasible use in perovskite solar cells. *RSC Adv*. **9**, 9348 (2019).
60. Gao, L. et al. Flexible, transparent nanocellulose paper-based perovskite solar cells. *npj Flexible Electronics* **3**, 4 (2019).
61. Zhu, K. et al. Ultraflexible and lightweight bamboo-derived transparent electrodes for perovskite solar cells. *Small* **15**, 1902878 (2019).
